# Supplementary material for: Amantadine delayed release/extended release capsules significantly reduce OFF time in Parkinson’s disease
Source: PubMed Central journal article supplement (PMC8933492; doi:10.1038/s41531-022-00291-1), 2022-03-18
Supplement: 41531_2022_291_MOESM2_ESM.pdf [file 41531_2022_291_MOESM2_ESM.pdf]

## Reporting Summary

Nature Portfolio wishes to improve the reproducibility of the work that we publish. This form provides structure for consistency and transparency in reporting. For further information on Nature Portfolio policies, see our [Editorial Policies](#) and the [Editorial Policy Checklist](#).

### Statistics

For all statistical analyses, confirm that the following items are present in the figure legend, table legend, main text, or Methods section.

n/a Confirmed

- The exact sample size ( $n$ ) for each experimental group/condition, given as a discrete number and unit of measurement
- A statement on whether measurements were taken from distinct samples or whether the same sample was measured repeatedly
- The statistical test(s) used AND whether they are one- or two-sided  
*Only common tests should be described solely by name; describe more complex techniques in the Methods section.*
- A description of all covariates tested
- A description of any assumptions or corrections, such as tests of normality and adjustment for multiple comparisons
- A full description of the statistical parameters including central tendency (e.g. means) or other basic estimates (e.g. regression coefficient) AND variation (e.g. standard deviation) or associated estimates of uncertainty (e.g. confidence intervals)
- For null hypothesis testing, the test statistic (e.g.  $F$ ,  $t$ ,  $r$ ) with confidence intervals, effect sizes, degrees of freedom and  $P$  value noted  
*Give  $P$  values as exact values whenever suitable.*
- For Bayesian analysis, information on the choice of priors and Markov chain Monte Carlo settings
- For hierarchical and complex designs, identification of the appropriate level for tests and full reporting of outcomes
- Estimates of effect sizes (e.g. Cohen's  $d$ , Pearson's  $r$ ), indicating how they were calculated

*Our web collection on [statistics for biologists](#) contains articles on many of the points above.*

### Software and code

Policy information about [availability of computer code](#)

Data collection

Data analysis

For manuscripts utilizing custom algorithms or software that are central to the research but not yet described in published literature, software must be made available to editors and reviewers. We strongly encourage code deposition in a community repository (e.g. GitHub). See the Nature Portfolio [guidelines for submitting code & software](#) for further information.

### Data

Policy information about [availability of data](#)

All manuscripts must include a [data availability statement](#). This statement should provide the following information, where applicable:

- Accession codes, unique identifiers, or web links for publicly available datasets
- A description of any restrictions on data availability
- For clinical datasets or third party data, please ensure that the statement adheres to our [policy](#)

The datasets generated during and/or analyzed during the current study are available from Adamas Pharmaceuticals on reasonable request. Adamas Pharmaceuticals Inc will share study documents with qualified researchers who provide valid research questions. Requests should be directed to [info@adamaspharma.com](mailto:info@adamaspharma.com)

## Field-specific reporting

Please select the one below that is the best fit for your research. If you are not sure, read the appropriate sections before making your selection.

Life sciences  Behavioural & social sciences  Ecological, evolutionary & environmental sciences

For a reference copy of the document with all sections, see [nature.com/documents/nr-reporting-summary-flat.pdf](https://www.nature.com/documents/nr-reporting-summary-flat.pdf)

## Life sciences study design

All studies must disclose on these points even when the disclosure is negative.

|                 |                                                                                                                                                                                                                                                        |
|-----------------|--------------------------------------------------------------------------------------------------------------------------------------------------------------------------------------------------------------------------------------------------------|
| Sample size     | Pooled analysis of previously published Phase 3 trials                                                                                                                                                                                                 |
| Data exclusions | No exclusions, except for the responder analyses in which participants who had 0 hours of OFF at baseline were excluded because there was no room for improvement (as noted in paper).                                                                 |
| Replication     | Reproducibility is shown between EASE LID and EASE LID 3 which had similar results separately. This paper is a report of the pooled analysis.                                                                                                          |
| Randomization   | Randomization procedures are fully described in the previous primary publications which are correctly referenced in this pooled analysis. Randomization in both double-blind trials was accomplished through an interactive web-based response system. |
| Blinding        | As noted in the paper, EASE LID and EASE LID 3 were both double-blind clinical trials. All patients, study site personnel, raters, the sponsor, and contract research organization staff were blinded to group assignment. EASE LID 2 was open-label.  |

## Reporting for specific materials, systems and methods

We require information from authors about some types of materials, experimental systems and methods used in many studies. Here, indicate whether each material, system or method listed is relevant to your study. If you are not sure if a list item applies to your research, read the appropriate section before selecting a response.

### Materials & experimental systems

| n/a                                 | Included in the study                                           |
|-------------------------------------|-----------------------------------------------------------------|
| <input checked="" type="checkbox"/> | <input type="checkbox"/> Antibodies                             |
| <input checked="" type="checkbox"/> | <input type="checkbox"/> Eukaryotic cell lines                  |
| <input checked="" type="checkbox"/> | <input type="checkbox"/> Palaeontology and archaeology          |
| <input checked="" type="checkbox"/> | <input type="checkbox"/> Animals and other organisms            |
| <input type="checkbox"/>            | <input checked="" type="checkbox"/> Human research participants |
| <input type="checkbox"/>            | <input checked="" type="checkbox"/> Clinical data               |
| <input checked="" type="checkbox"/> | <input type="checkbox"/> Dual use research of concern           |

### Methods

| n/a                                 | Included in the study                           |
|-------------------------------------|-------------------------------------------------|
| <input checked="" type="checkbox"/> | <input type="checkbox"/> ChIP-seq               |
| <input checked="" type="checkbox"/> | <input type="checkbox"/> Flow cytometry         |
| <input checked="" type="checkbox"/> | <input type="checkbox"/> MRI-based neuroimaging |

## Human research participants

Policy information about [studies involving human research participants](#)

|                            |                                                                                                                                                                                                                                                                                                                                                                                                                            |
|----------------------------|----------------------------------------------------------------------------------------------------------------------------------------------------------------------------------------------------------------------------------------------------------------------------------------------------------------------------------------------------------------------------------------------------------------------------|
| Population characteristics | Participant characteristics are summarized in Table 1.                                                                                                                                                                                                                                                                                                                                                                     |
| Recruitment                | Recruitment was at specialist sites and was primarily based on the presence of dyskinesia.                                                                                                                                                                                                                                                                                                                                 |
| Ethics oversight           | Full ethics approval information is given in the prior primary publications. All three trials were conducted in compliance with the Declaration of Helsinki and International Conference on Harmonization (ICH) Good Clinical Practice (GCP) guidelines; all participating sites received institutional review board approval and all participants provided written informed consent before any procedures were performed. |

Note that full information on the approval of the study protocol must also be provided in the manuscript.

## Clinical data

Policy information about [clinical studies](#)

All manuscripts should comply with the ICMJE [guidelines for publication of clinical research](#) and a completed [CONSORT checklist](#) must be included with all submissions.

|                             |                                                                                                                                           |
|-----------------------------|-------------------------------------------------------------------------------------------------------------------------------------------|
| Clinical trial registration | NCT02136914, NCT02274766, NCT02202551                                                                                                     |
| Study protocol              | Protocols for the previously published trials are available at <a href="https://clinicaltrials.gov">clinicaltrials.gov</a> and on request |

Data collection

EASE LID: May 7, 2014, and July 22, 2015 at 44 North American sites; EASE LID 3: 39 sites in the United States and Western Europe; EASE LID: 2 July 28, 2014, and March 10, 2016 at 67 sites in the United States and Western Europe

Outcomes

This was a pooled analysis of OFF time in the double-blind trials, which was prospectively collected in home diaries as a key secondary outcome measure. The MDS-UPDRS and CGI-C were also secondary outcomes. The MDS-UPDRS was the only PD rating instrument in the open-label trial, with MDS-UPDRS Part IV (items 4.1- 4.6) being the principal assessment of motor complications.
